# Supplementary material
Source: Research Square preprint supplement (doi:10.21203/rs.3.rs-9090581/v1)
Supplement: Supplementary file 1 [file 945e462335724a57ab8abacf.docx]

**Table S1. Simple and Multiple Logistic Regression Model of Studied Variables**

| Variable | Simple Logistic Regression | | Multiple Logistic Regression | |
| --- | --- | --- | --- | --- |
| OR (95%CI) | P | OR (95%CI) | P |
| (Intercept) | 6.89 (1.88–25.28) | < 0.001 | 6.89 (1.88–25.28) | < 0.001 |
| Birth Weight | 1.00 (1.00–1.00) | < 0.001 | 1.00 (1.00–1.00) | < 0.001 |
| Gestation Age | 0.96 (0.93–1.00) | 0.05 | 0.96 (0.93–1.00) | 0.05 |
| Neonatal Risk Count | 1.42 (1.23–1.63) | < 0.001 | 1.42 (1.23–1.63) | < 0.001 |
| Maternal High-Risk Count | 0.80 (0.76–0.84) | < 0.001 | 0.80 (0.76–0.84) | < 0.001 |
| Hematologic Metabolic Count | 0.95 (0.82–1.09) | 0.45 | 0.95 (0.82–1.09) | 0.45 |
| Respiratory Support Count | 0.93 (0.82–1.05) | 0.26 | 0.93 (0.82–1.05) | 0.26 |
| Feeding GI Issues Count | 1.05 (0.88–1.24) | 0.58 | 1.05 (0.88–1.24) | 0.58 |
| Gender | 1.06 (0.97–1.16) | 0.17 | 1.06 (0.97–1.16) | 0.17 |

Note: AUC=0.6 for multiple logistic regression model

**Table S2. Variance Inflation Factors (VIFs) for Predictors in the Multivariable Logistic Regression Model**

| Parameter | Values |
| --- | --- |
| Birth Weight | 1.78 |
| Gestation Age | 2.17 |
| Neonatal Risk Count | 1.98 |
| Maternal High-Risk Count | 1.06 |
| Hematologic Metabolic Count | 1.63 |
| Respiratory Support Count | 1.37 |
| Feeding GI Issues Count | 1.18 |
| Gender | 1.04 |
